# Supplementary material for: Butane Tetracarboxylic Acid Grafted on Polymeric Nanofibrous Aerogels for Highly Efficient Protein Absorption and Separation
Source: MDPI journal article supplement (doi:10.3390/polym16091270), 2024-05-02
Supplement: s1 [file s1]

Supplementary Material of

**Butane tetracarboxylic acid grafted on  
polymeric nanofibrous aerogels for highly  
efficient protein absorption and separation**

Jianwei Lu\*, Yangang Jiang, Yufei Qiao, Zihao Wen, Zhengjin Luo, Mukhtar

Ahmed, Amjad Ali, Li Guo\*

School of Materials Science and Engineering, Jiangsu University, Zhenjiang,  
212013, China

Department of Zoology, College of Science, King Saud University, P. O. Box  
2455, Riyadh 11451, Kingdom of Saudi Arabia

\* Correspondence: [jianwei@ujs.edu.cn](mailto:jianwei@ujs.edu.cn) (J.L.); [liguo@ujs.edu.cn](mailto:liguo@ujs.edu.cn) (L.G.)

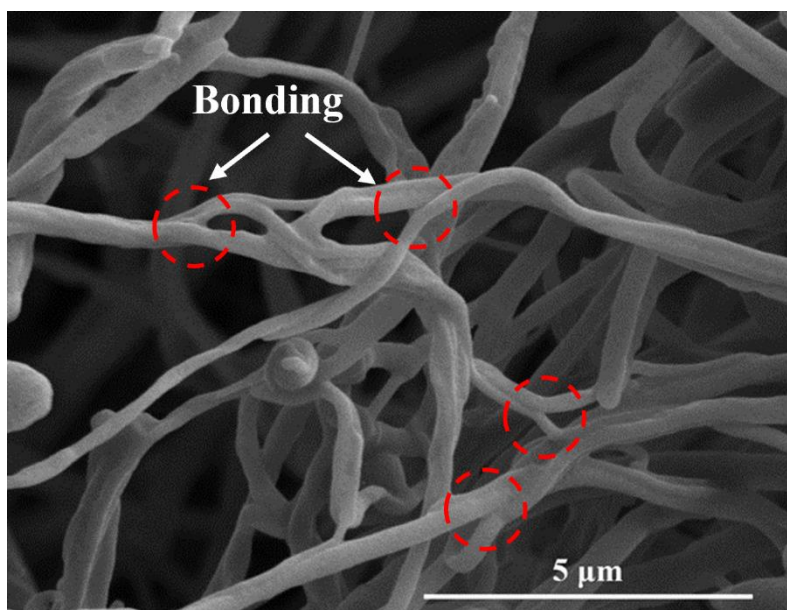

**Figure S1. FE-SEM images of EVOH NFAs**

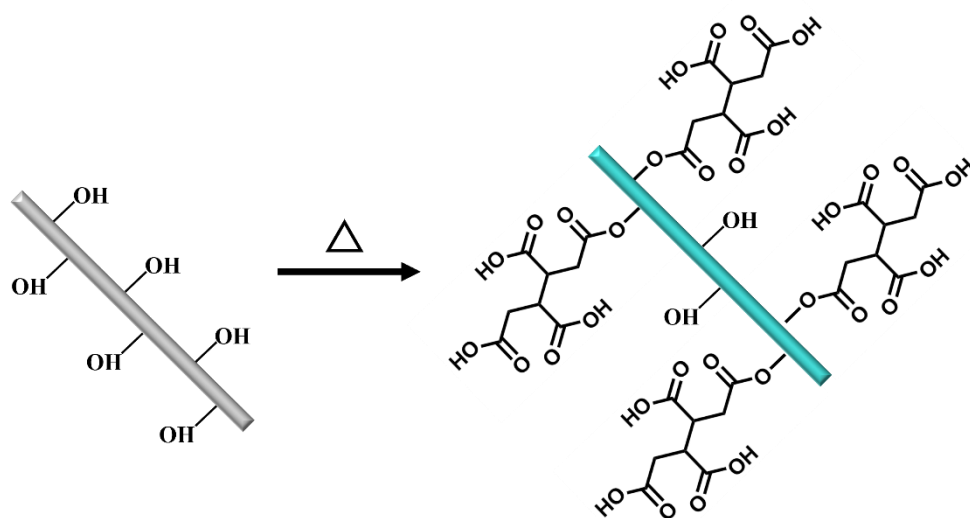

Figure S2. Schematic of carboxyl grafting process

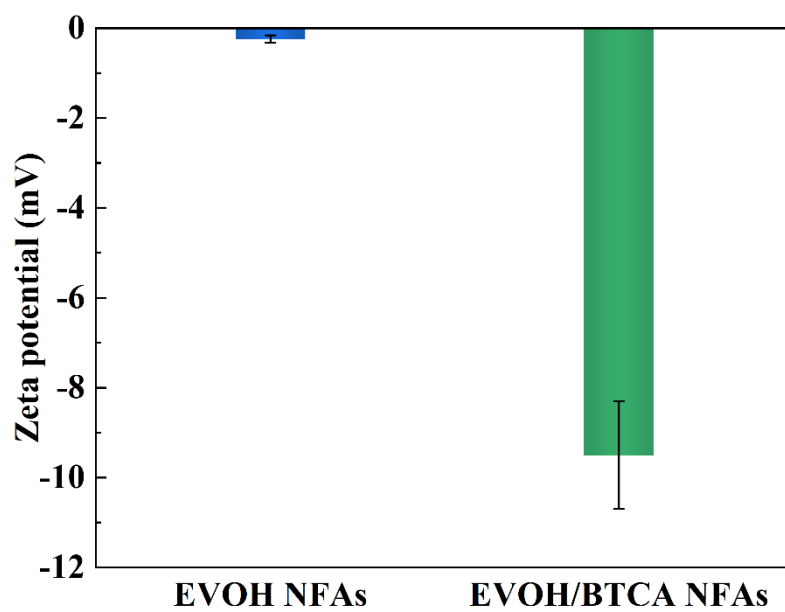

**Figure S3.** The zeta potential of EVOH NFAs and EVOH/BTCA NFAs

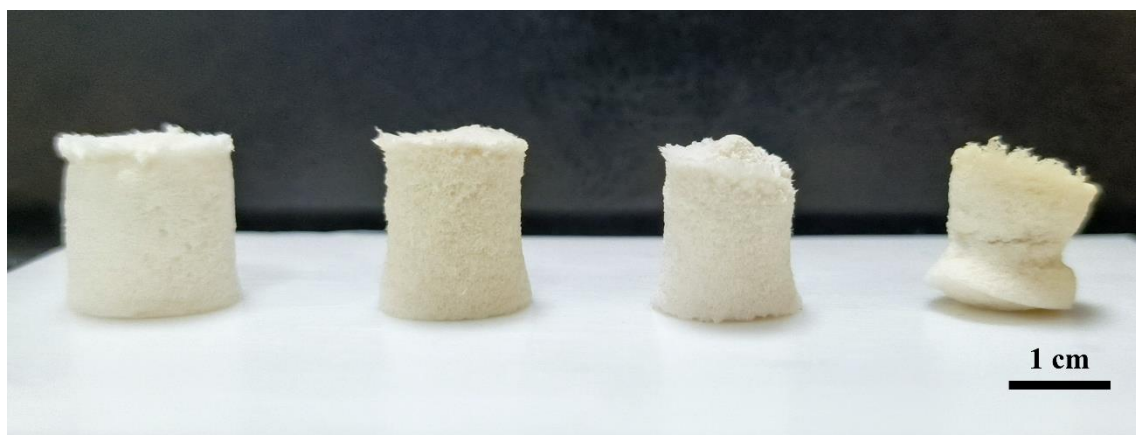

**Figure S4. Photographs of EVOH/BTCA NFAs with various BTCA contents (the BTCA content from left to right is 0, 4, 10 and 16 wt%)**

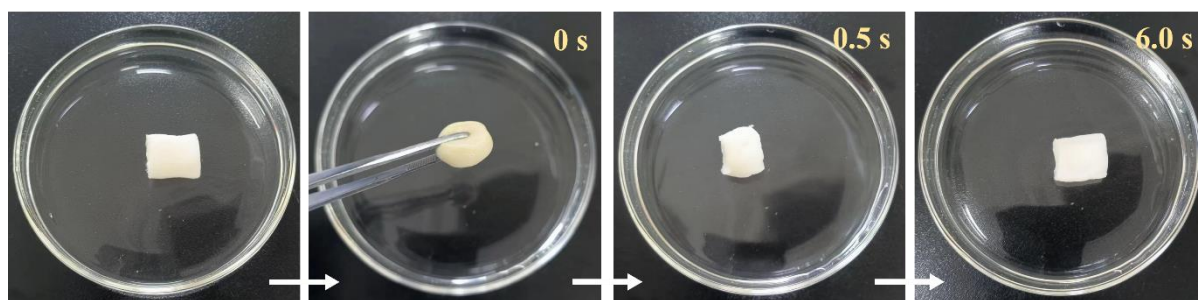

**Figure S5. Photographs of the underwater shape-memory properties of EVOH/BTCA NFAs**
